# Supplementary material for: Exposure to PM2.5 and Obesity Prevalence in the Greater Mexico City Area
Source: PubMed Central journal article supplement (PMC7956483; doi:10.3390/ijerph18052301), 2021-02-26
Supplement: ijerph-18-02301-s001.pdf [file ijerph-18-02301-s001.pdf]

**Supplementary Table S1.** Results from crude and weighted models for the association between past year PM<sub>2.5</sub> (10 µg/m<sup>3</sup> increase) with obesity in children, adolescents and adults\* from the Greater Mexico City Area using data from the National Nutrition and Health Surveys, ENSANUT-2006 and 2012.

|                       | Children             |              | Adolescents          |                      | Adults                |                     |
|-----------------------|----------------------|--------------|----------------------|----------------------|-----------------------|---------------------|
|                       | OR                   | 95% CI       | OR                   | 95% CI               | OR                    | 95% CI              |
| <b>ENSANUT 2006</b>   |                      |              |                      |                      |                       |                     |
| <i>Weighted model</i> | <i>n</i> = 2,529,289 |              | <i>n</i> = 3,548,352 |                      | <i>n</i> = 12,541,729 |                     |
|                       | 1.24                 | (0.49, 3.13) | <b>3.53</b>          | <b>(1.45, 8.58)</b>  | 1.01                  | (0.59, 1.73)        |
| <i>Crude model</i>    | <i>n</i> = 618       |              | <i>n</i> = 801       |                      | <i>n</i> = 1559       |                     |
|                       | 0.95                 | (0.39, 2.28) | <b>2.38</b>          | <b>(1.05, 5.38)</b>  | 1.09                  | (0.66, 1.81)        |
| <b>ENSANUT 2012</b>   |                      |              |                      |                      |                       |                     |
| <i>Weighted model</i> | <i>n</i> = 2,769,354 |              | <i>n</i> = 3,245,296 |                      | <i>n</i> = 11,415,512 |                     |
|                       | 1.77                 | (0.82, 3.86) | <b>3.79</b>          | <b>(1.40, 10.24)</b> | 2.73                  | (0.97, 7.71)        |
| <i>Crude model</i>    | <i>n</i> = 753       |              | <i>n</i> = 758       |                      | <i>n</i> = 1559       |                     |
|                       | 1.96                 | (0.56, 6.77) | 2.44                 | (0.76, 7.84)         | <b>2.16</b>           | <b>(1.04, 4.48)</b> |

Statistically significant results (p <0.05) are highlighted in bold letters.
